# Supplementary material for: Day centres for older people - attender characteristics, access routes and outcomes of regular attendance: findings of exploratory mixed methods case study research
Source: PubMed Central journal article supplement (PMC7197165; doi:10.1186/s12877-020-01529-4), 2020-05-04
Supplement: 12877_2020_1529_MOESM1_ESM.pdf [file 12877_2020_1529_MOESM1_ESM.pdf]

## ADDITIONAL FILE 1

### Older attenders of day centres: qualitative semi-structured interview guide

#### Contextual information – what a usual week looks like

---

We'll start by thinking about what a usual week looks like for you. Using an A3 print-out of a 'map of a usual week' divided into days of the week and morning, afternoon and evening, interviewer guides conversation about what happens during what interviewees consider to be a 'usual' week for them and fill in the 'map'. Anything fortnightly/monthly will be marked as such. Aim: to cover all informal and formal support and activities: any care/support they receive (family, relatives, friends) or which they pay for [who from? how paid?], any activities they attend or are involved in, social/other visits received, outings etc.

#### Why person attends, their experiences, outcomes and connections with other attenders outside the day centre

---

Can you tell me how you travel here?

Would you like to tell me what started you thinking about coming to a day centre like [*name of day centre*]?

What did you think of day centres such as [*name of day centre*] some time ago, before coming here?

Have you made any friends at [*name of day centre*] who you see, or are in touch with by phone, outside the day centre?

On a practical note, have you been given any information, got involved in other activities or used other services through [*name of day centre*]?

What, if anything, has changed for you as a result [of these]?

Can you tell me about how you've found the whole experience of coming here?

How do you pay for this day centre service? [If you don't pay: who pays the costs of the centre?]

If you were unhappy with anything, would you know what to do about it and would you feel comfortable bringing it up?

Would you recommend coming to [*name of day centre*] to friends, family or a newcomer to the area who is in a similar situation to yourself?

Would you say that coming here adds anything to your life?

Please could you describe the two things you like best about coming to [*name of day centre*]?

Please could you describe the two things you like least about coming to [*name of day centre*]?

Do you plan to continue coming here? If not, why is that?

If you have a relative caring for you, do you think that you coming to [*name of day centre*] helps them in any way?

Is there anything else you'd like to tell me about [*name of day centre*]?

**Day centres for older people: attender characteristics, access routes and outcomes of regular attendance. Findings of exploratory mixed methods case study research.**

Authors: Katharine Orellana, Jill Manthorpe, Anthea Tinker
