# Supplementary material for: Day centres for older people - attender characteristics, access routes and outcomes of regular attendance: findings of exploratory mixed methods case study research
Source: PubMed Central journal article supplement (PMC7197165; doi:10.1186/s12877-020-01529-4), 2020-05-04
Supplement: 12877_2020_1529_MOESM2_ESM.pdf [file 12877_2020_1529_MOESM2_ESM.pdf]

## ADDITIONAL FILE 2

### Coding frame: Attenders' circumstances, motivations and outcomes

| <b>THEMES</b>                                           | <b>CIRCUMSTANCES WHEN STARTING TO THINK ABOUT DAY CENTRE ATTENDANCE</b>                                                                                            | <b>PRIMARY MOTIVATIONS FOR DAY CENTRE ATTENDANCE</b>                                                 | <b>OUTCOMES (*unique contribution)</b>                                                                                                                                                                                                                                                                                                                    |
|---------------------------------------------------------|--------------------------------------------------------------------------------------------------------------------------------------------------------------------|------------------------------------------------------------------------------------------------------|-----------------------------------------------------------------------------------------------------------------------------------------------------------------------------------------------------------------------------------------------------------------------------------------------------------------------------------------------------------|
| <b>ACTIVITY-RELATED</b>                                 | Closure of other DC or club / other DC criteria changed<br>Had to stop volunteering<br>Retirement<br>Something to do<br>Somewhere to go<br>To keep mind alive      | Something helpful to do after retirement<br>To keep mind alive<br>Wanting to do activities/something | Activities keep mind occupied/stimulated<br>DC attendance keeps your time occupied<br>Different to what would be doing at home<br>Doing something vs nothing at home<br>Done things wouldn't have done otherwise (e.g. craft, trips out*)<br>Given something to do/think about -an interest-conversation material<br>Specific activities (went there for) |
| <b>CARER-RELATED</b>                                    | Carer needed a break<br>Isolated as a spousal carer<br>Attended with husband who cared for (unclear why)                                                           | Attended with husband who cared for (unclear why)                                                    |                                                                                                                                                                                                                                                                                                                                                           |
| <b>CHANGE OF ENVIRONMENT/ GETTING OUT OF HOUSE</b>      | Not getting out enough<br>Stuck at home                                                                                                                            | Want to get out / a change of environment                                                            | Access to a garden<br>Gets out of house/4 walls (prison/boring)<br>Nowhere else to go-only way to get out-gives chance to go out*<br>Place to go without difficulties of trips out*                                                                                                                                                                       |
| <b>LOSS OF MOBILITY (independence)- physical health</b> | Couldn't get out without help-transport<br>Decline in physical health – sudden<br>General decline in physical health<br>Loss of car-stopped driving (independence) |                                                                                                      |                                                                                                                                                                                                                                                                                                                                                           |
| <b>FOR MEALS</b>                                        |                                                                                                                                                                    | For meals                                                                                            | Having a meal                                                                                                                                                                                                                                                                                                                                             |
| <b>MENTAL WELLBEING/HEALTH</b>                          | Anxiety disorder<br>Depression - felt low/down<br>Felt lonely<br>Lacked confidence                                                                                 | To address diagnosed mental illness                                                                  | Boredom-monotony broken-change-break<br>Changed-enriched life-opened up new life*<br>Enjoyment-fun-laughter*<br>Feel more stimulated mentally<br>Feels energised - motivated                                                                                                                                                                              |

**Day centres for older people: attender characteristics, access routes and outcomes of regular attendance. Findings of exploratory mixed methods case study research.**

Authors: Katharine Orellana, Jill Manthorpe, Anthea Tinker

|                                                                     |  |                                                                          |                                                                                                                                                                                                                                                                                                                                                                                                                          |                                                                                                                                                                                                                                                                                                            |
|---------------------------------------------------------------------|--|--------------------------------------------------------------------------|--------------------------------------------------------------------------------------------------------------------------------------------------------------------------------------------------------------------------------------------------------------------------------------------------------------------------------------------------------------------------------------------------------------------------|------------------------------------------------------------------------------------------------------------------------------------------------------------------------------------------------------------------------------------------------------------------------------------------------------------|
|                                                                     |  |                                                                          | <p>Gained perspective of own situation<br/> Lifeline-lifesaver<br/> Other - own attitude matters<br/> Feeling part of a group-belonging*<br/> Sense of independence &amp; control*<br/> Sense of purpose - feeling useful to others-<br/> making a contribution-active role to play-<br/> opportunity to do so*<br/> Sense of purpose/structure within own life<br/> Feelings of freedom*<br/> Nothing added to life</p> |                                                                                                                                                                                                                                                                                                            |
|                                                                     |  |                                                                          | Feeling better*                                                                                                                                                                                                                                                                                                                                                                                                          | <p>Less lonely*<br/> Less depressed-sad/makes feel happy*<br/> More confident &amp; relaxed*<br/> Helped to keep sanity*</p>                                                                                                                                                                               |
| <b>PHYSICAL HEALTH/<br/>WELLBEING/SAFETY</b>                        |  | Exercise<br>Exercise - referred to drop-in GROUP rehab exercise (health) | <p>Do more exercise<br/> Health monitoring (&amp; outlet for problems)<br/> Safe place-feeling safer</p>                                                                                                                                                                                                                                                                                                                 |                                                                                                                                                                                                                                                                                                            |
| <b>PRACTICAL SUPPORT, INFORMATION &amp; OTHER SERVICES ACCESSED</b> |  |                                                                          | What accessed                                                                                                                                                                                                                                                                                                                                                                                                            | <p>Other services used (DC provider)<br/> Personal alarm system<br/> Services of another provider<br/> Taxi vouchers-card</p>                                                                                                                                                                              |
|                                                                     |  |                                                                          | Within DC                                                                                                                                                                                                                                                                                                                                                                                                                | <p>Chiropodist<br/> Clothes<br/> District nurse now treats at DC<br/> Hairdresser<br/> Hearing aid maintenance-batteries<br/> Help with appointments (staff-vols)<br/> Information &amp; useful talks<br/> Massage<br/> Nails filed &amp; painted (staff-vols)<br/> Staff-vols helped access something</p> |
|                                                                     |  |                                                                          | Made a difference                                                                                                                                                                                                                                                                                                                                                                                                        | <p>More aware of certain things<br/> More money</p>                                                                                                                                                                                                                                                        |

**Day centres for older people: attender characteristics, access routes and outcomes of regular attendance. Findings of exploratory mixed methods case study research.**

Authors: Katharine Orellana, Jill Manthorpe, Anthea Tinker

|                                           |                                                                                                                                                                                                                                                                                                               |                                                             |                                                                                                                                                                                                                                         |                                                                                                                                                                                 |
|-------------------------------------------|---------------------------------------------------------------------------------------------------------------------------------------------------------------------------------------------------------------------------------------------------------------------------------------------------------------|-------------------------------------------------------------|-----------------------------------------------------------------------------------------------------------------------------------------------------------------------------------------------------------------------------------------|---------------------------------------------------------------------------------------------------------------------------------------------------------------------------------|
|                                           |                                                                                                                                                                                                                                                                                                               |                                                             |                                                                                                                                                                                                                                         | Safer - peace of mind<br>Saved money<br>Saved trips elsewhere<br>Did not say whether made a difference                                                                          |
| <b>SOCIAL INTERACTION / COMPANIONSHIP</b> | Alone (not bereaved)<br>Bereavement (spouse-partner)-was on own<br>Insufficient contact with peers<br>Insufficient contact with people – socialising<br>Loss of existing social networks (non-group)<br>Loss of outside activities - stopped attending other group/club<br>Attender naturally sociable/joiner | Needed-wanted to socialise-see people<br>Contact with peers | Companionship*<br>Company makes a change<br>Eating in company<br>Friends - made new ones<br>Friends - reconnected with old ones<br>Laugh & fun & joke*<br>Conversation material<br>Proper conversation about things that really matter* |                                                                                                                                                                                 |
|                                           |                                                                                                                                                                                                                                                                                                               |                                                             | Contact with people                                                                                                                                                                                                                     | Own age group*<br>People generally<br>Arguing<br>Chatting<br>Hearing people<br>Seeing people<br>People who are also lonely-similar circumstances<br>A range of different people |
