# Supplementary material for: Day centres for older people - attender characteristics, access routes and outcomes of regular attendance: findings of exploratory mixed methods case study research
Source: PubMed Central journal article supplement (PMC7197165; doi:10.1186/s12877-020-01529-4), 2020-05-04
Supplement: 12877_2020_1529_MOESM3_ESM.pdf [file 12877_2020_1529_MOESM3_ESM.pdf]

# ADDITIONAL FILE 3

## Illustrative 'Maps of a Usual Week'

|                       |
|-----------------------|
| MEDICAL               |
| SOCIAL                |
| EDUCATIONAL           |
| FAMILY                |
| PAID CARE             |
| DAY CENTRE            |
| ACTIVITY TYPES: OTHER |

| Nellie           | Monday                                                                                             | Tuesday                                                                                 | Wednesday                     | Thursday                      | Friday                        | Saturday                      | Sunday                        |
|------------------|----------------------------------------------------------------------------------------------------|-----------------------------------------------------------------------------------------|-------------------------------|-------------------------------|-------------------------------|-------------------------------|-------------------------------|
| <b>Morning</b>   | 7<br>8 Keeps whole day free for:<br>- blood tests<br>9 - delivery of medication<br>Cleaner hoovers | 7<br>8<br>9 Weekly trip to Tesco. Has permanent booking with Dial-a-Ride for transport. | 7<br>8<br>9<br>10<br>11<br>12 | 7<br>8<br>9<br>10<br>11<br>12 | 7<br>8<br>9<br>10<br>11<br>12 | 7<br>8<br>9<br>10<br>11<br>12 | 7<br>8<br>9<br>10<br>11<br>12 |
| <b>Afternoon</b> | 13<br>14<br>15<br>16<br>17                                                                         | 13<br>14<br>15<br>16<br>17                                                              | 13<br>14<br>15<br>16<br>17    | 13<br>14<br>15<br>16<br>17    | 13<br>14<br>15<br>16<br>17    | 13<br>14<br>15<br>16<br>17    | 13<br>14<br>15<br>16<br>17    |
| <b>Evening</b>   | 18<br>19<br>20<br>21                                                                               | 18<br>19<br>20<br>21                                                                    | 18<br>19<br>20<br>21          | 18<br>19<br>20<br>21          | 18<br>19<br>20<br>21          | 18<br>19<br>20<br>21          | 18<br>19<br>20<br>21          |

| Elizabeth        | Monday                        | Tuesday                       | Wednesday                     | Thursday                      | Friday                        | Saturday                      | Sunday                        |
|------------------|-------------------------------|-------------------------------|-------------------------------|-------------------------------|-------------------------------|-------------------------------|-------------------------------|
| <b>Morning</b>   | 7<br>8<br>9<br>10<br>11<br>12 | 7<br>8<br>9<br>10<br>11<br>12 | 7<br>8<br>9<br>10<br>11<br>12 | 7<br>8<br>9<br>10<br>11<br>12 | 7<br>8<br>9<br>10<br>11<br>12 | 7<br>8<br>9<br>10<br>11<br>12 | 7<br>8<br>9<br>10<br>11<br>12 |
| <b>Afternoon</b> | 13<br>14<br>15<br>16<br>17    | 13<br>14<br>15<br>16<br>17    | 13<br>14<br>15<br>16<br>17    | 13<br>14<br>15<br>16<br>17    | 13<br>14<br>15<br>16<br>17    | 13<br>14<br>15<br>16<br>17    | 13<br>14<br>15<br>16<br>17    |
| <b>Evening</b>   | 18<br>19<br>20<br>21          | 18<br>19<br>20<br>21          | 18<br>19<br>20<br>21          | 18<br>19<br>20<br>21          | 18<br>19<br>20<br>21          | 18<br>19<br>20<br>21          | 18<br>19<br>20<br>21          |

**Day centres for older people: attender characteristics, access routes and outcomes of regular attendance. Findings of exploratory mixed methods case study research.**

Authors: Katharine Orellana, Jill Manthorpe, Anthea Tinker
