# Supplementary material for: Day centres for older people - attender characteristics, access routes and outcomes of regular attendance: findings of exploratory mixed methods case study research
Source: PubMed Central journal article supplement (PMC7197165; doi:10.1186/s12877-020-01529-4), 2020-05-04
Supplement: 12877_2020_1529_MOESM4_ESM.pdf [file 12877_2020_1529_MOESM4_ESM.pdf]

## ADDITIONAL FILE 4: Summary of data informing outcomes themes

| Outcomes themes                                           | QUALITATIVE DATA (n=23)                                                                                                                                                                                                                                                                                                                                                                                                                                                                                             |                                                                                                                                         |                                      | QUANTITATIVE DATA (ASCOT INT4) (n=22)                                                |                                                                                                                            |
|-----------------------------------------------------------|---------------------------------------------------------------------------------------------------------------------------------------------------------------------------------------------------------------------------------------------------------------------------------------------------------------------------------------------------------------------------------------------------------------------------------------------------------------------------------------------------------------------|-----------------------------------------------------------------------------------------------------------------------------------------|--------------------------------------|--------------------------------------------------------------------------------------|----------------------------------------------------------------------------------------------------------------------------|
|                                                           | Attendees reporting this outcome                                                                                                                                                                                                                                                                                                                                                                                                                                                                                    | Attendees reporting this unique contribution to their lives                                                                             | Total no. of references within theme | Attendees responding that attendance made a difference to their lives in this domain | SCRQoL gain                                                                                                                |
| Social participation/ companionship                       | 21                                                                                                                                                                                                                                                                                                                                                                                                                                                                                                                  | 11                                                                                                                                      | 247                                  | 19                                                                                   | Highest gain                                                                                                               |
| Activities/changing way spent time                        | 17                                                                                                                                                                                                                                                                                                                                                                                                                                                                                                                  | 6                                                                                                                                       | 117                                  | 15 (occupation)                                                                      | Joint second highest gain                                                                                                  |
| Mental wellbeing & health                                 | 20:<br>- enjoyment (n=18), laughter and fun (n=7)<br>- sense of purpose (n=5)<br>- sense of independence, freedom and control (n=3)<br>- boredom/monotony kept at bay (n=5)<br>- gained better perspective of own situation (n=4)<br>- felt more relaxed (n=3), less lonely (n=3), less depressed (n=3), more confident (n=3), more mentally stimulated (n=3) and energised (n=1)                                                                                                                                   | 7:<br>- 6 felt better<br>- 2 an opportunity to make a difference<br>- 2 feelings of freedom<br>- 1 feelings of independence and control | 187                                  | 11 (control over daily life)                                                         | Joint second highest gain: Dignity/personal sense of significance<br><br>Joint third highest gain: Control over daily life |
| Getting out of house / change of environment              | 13<br>- getting out for a change of environment (n=10)<br>- somewhere to go (n=3)                                                                                                                                                                                                                                                                                                                                                                                                                                   | 6                                                                                                                                       | 46                                   | NOT APPLICABLE                                                                       | NOT APPLICABLE                                                                                                             |
| Practical support, information & access to other services | 18                                                                                                                                                                                                                                                                                                                                                                                                                                                                                                                  | -                                                                                                                                       | 47                                   | NOT APPLICABLE                                                                       | NOT APPLICABLE                                                                                                             |
| Physical wellbeing, health & safety                       | 9:<br>- informal health and wellbeing monitoring (n=4)<br>- increased exercise (n=4)<br>- feeling physically safe (n=1)                                                                                                                                                                                                                                                                                                                                                                                             | -                                                                                                                                       | 21                                   | 12 (personal safety)                                                                 | Joint third highest gain: Personal safety                                                                                  |
| Having a meal                                             | 3                                                                                                                                                                                                                                                                                                                                                                                                                                                                                                                   | -                                                                                                                                       | 5                                    | 10 (food and drink)                                                                  | Fourth highest gain: Food and drink                                                                                        |
| Process outcomes                                          | 3: sense of independence, freedom and control<br>Value for money (19)<br>15: good or very good value for money<br>1: reasonable value for money<br>1: not good value for money<br>2: unsure or value for money is irrelevant<br><br>23: plan to continue attending<br>23: would recommend DC to others (13 quite or very strongly)<br><br>16: Looks forward to or loves attending<br>3: Happy to or likes attending<br>2: Conflicting feelings<br>1: Makes self go – know is good for them<br>1: Used to love going | 1: feelings of independence & control                                                                                                   |                                      | 11 (control over daily life)                                                         | Joint second highest gain: Dignity/personal sense of significance –                                                        |
| Accommodation cleanliness and comfort                     | NOT APPLICABLE                                                                                                                                                                                                                                                                                                                                                                                                                                                                                                      | -                                                                                                                                       | -                                    | 7                                                                                    | Lowest gain                                                                                                                |
| Personal care                                             | NOT APPLICABLE                                                                                                                                                                                                                                                                                                                                                                                                                                                                                                      | -                                                                                                                                       | -                                    | 7                                                                                    | No gain                                                                                                                    |

Day centres for older people: attender characteristics, access routes and outcomes of regular attendance. Findings of exploratory mixed methods case study research.

Authors: Katharine Orellana, Jill Manthorpe, Anthea Tinker
